# Supplementary material for: Transcriptome Analysis Reveals HgCl2 Induces Apoptotic Cell Death in Human Lung Carcinoma H1299 Cells through Caspase-3-Independent Pathway
Source: MDPI journal article supplement (doi:10.3390/ijms22042006), 2021-02-18

# Supplementary Figure 1

**A**

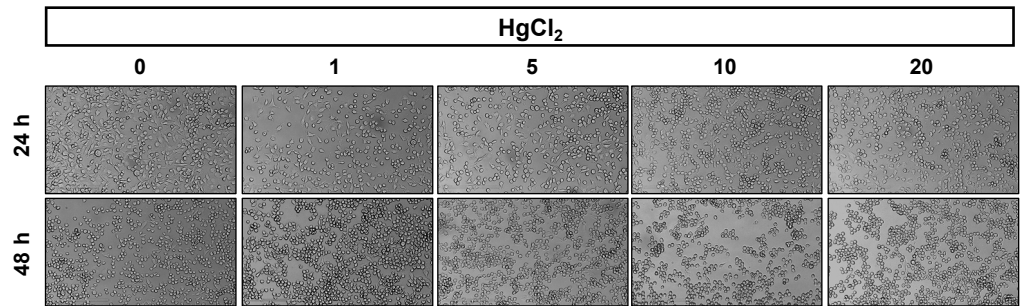

**B**

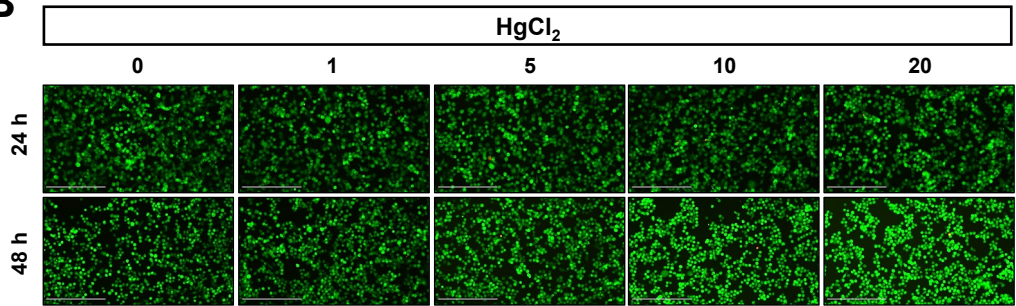

# Supplementary Figure 2

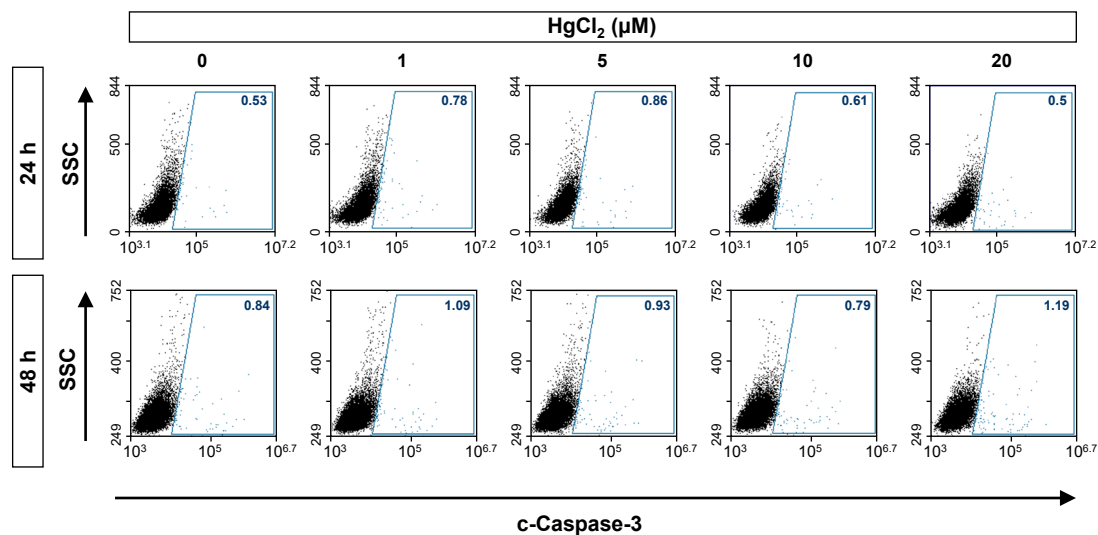

# Supplementary Figure 3

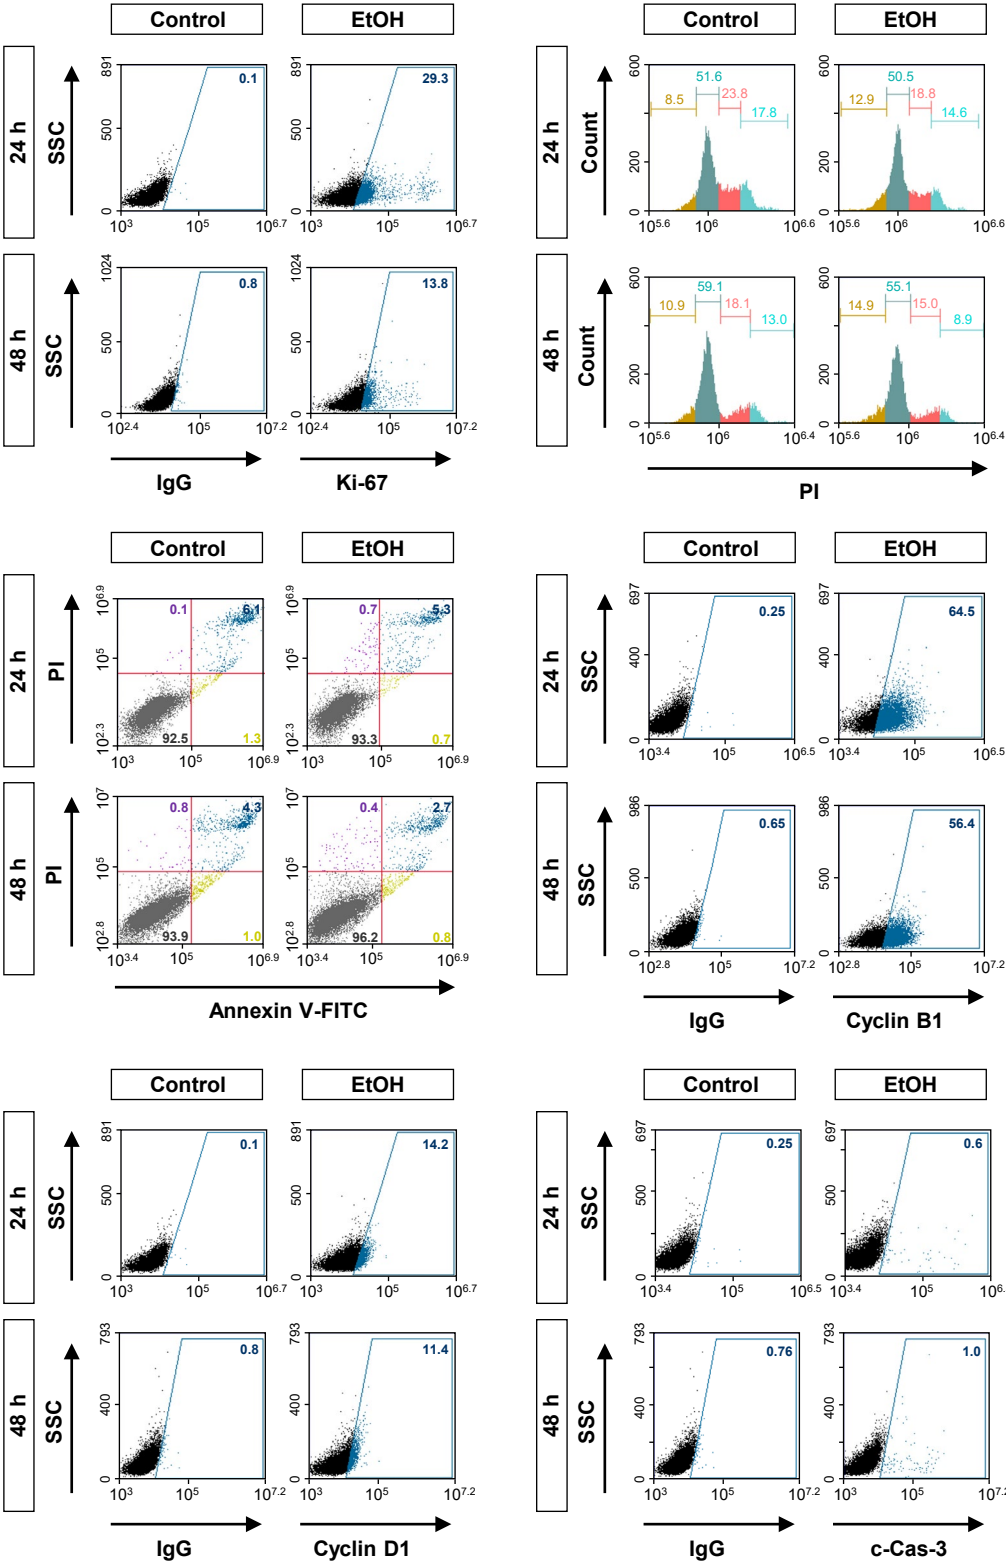

# Supplementary Figure 4

A

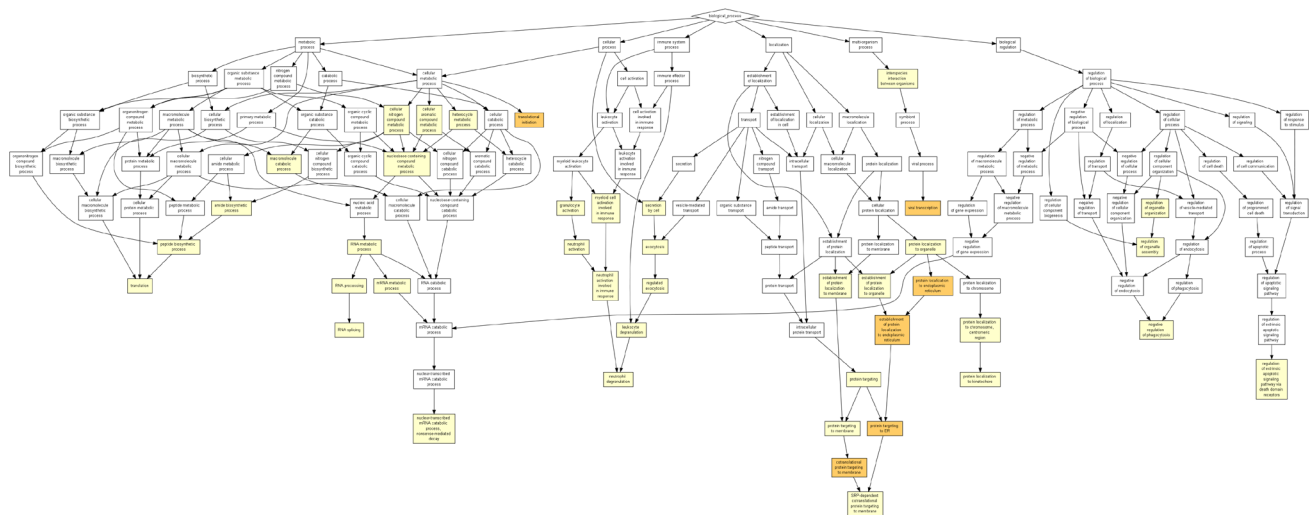

B

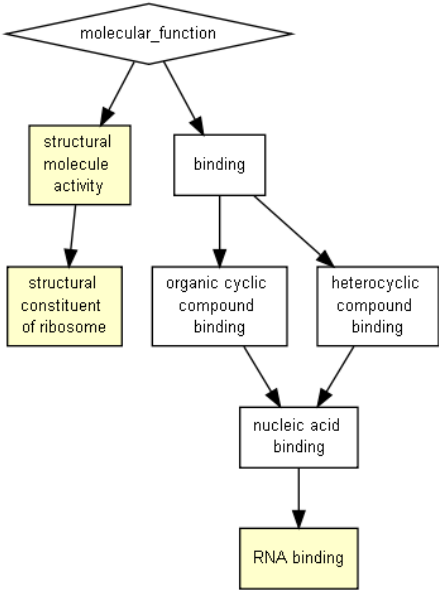

## Supplementary Figure 5

**A**

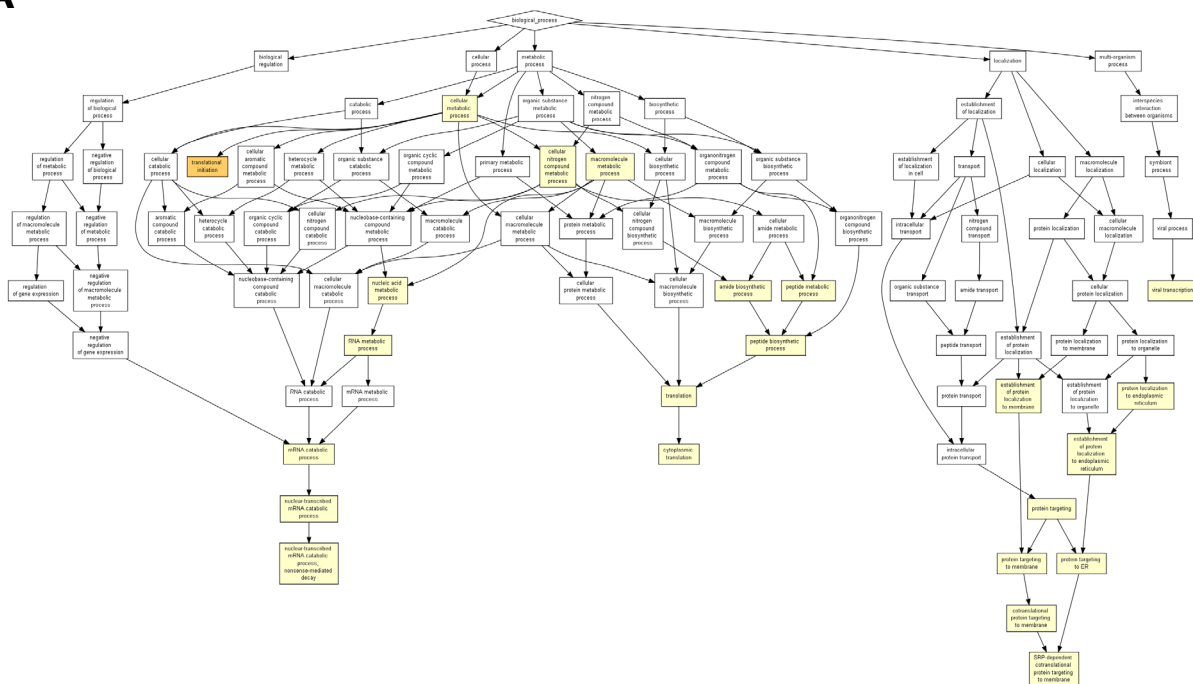

# B

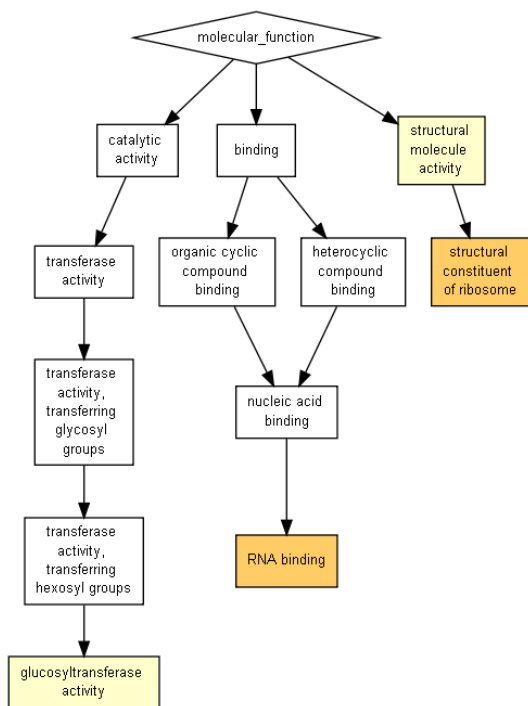

Supplement: s1 [file s1]
